# Supplementary material
Source: publisher figshare collection journal article supplement (https://sage.figshare.com/ndownloader/files/14146625)
Supplement: Supplementary file 1 [file 14146625]

**Toronto Alexithymia Scale – 20: Examining 18 Competing Factor Structure Solutions in a  
U.S. and the Philippines Sample**

**Supplemental Materials**

Antover P. Tuliao <sup>a</sup>, Alicia K. Klanecky <sup>b</sup>, Bernice Vania N. Landoy <sup>c</sup>,  
and Dennis E. McChargue <sup>d</sup>

<sup>a</sup>Community, Family, and Addiction Sciences, Texas Tech University

<sup>b</sup>Department of Psychology, Creighton University

<sup>c</sup>University of the Philippines – Visayas

<sup>d</sup>Department of Psychology, University of Nebraska – Lincoln

**Table S1**  
*Nested and Non-nested Pairwise Model Comparisons for the U.S. Sample*

|                                           | 1              | 2            | 3            | 4             | 5             | 6             | 7            |
|-------------------------------------------|----------------|--------------|--------------|---------------|---------------|---------------|--------------|
| A. Correlated Latent Factor Model         |                |              |              |               |               |               |              |
| 1 ALEX                                    |                |              |              |               |               |               |              |
| 2 DI/DDF-EOT                              | 181.505(1)*    |              |              |               |               |               |              |
| 3 DDF-DIF-EOT                             | 429.274 (3)*   | 178.855(2)*  |              |               |               |               |              |
| 4 DI/DDF-IM-PT                            | 221.625 (3)*   | 2.49 (2)     | -11.754*     |               |               |               |              |
| 5 DDF-DIF-IM-PT                           | 433.101 (6)*   | 136.124 (5)* | 3.478 (3)*   | 203.345 (3)*  |               |               |              |
| B. Common Method Factor Model             |                |              |              |               |               |               |              |
| 6 ALEX+CM                                 | 767.230 (5)*   | 8.646 *      | 0.126        | 8.340 *       | 0.377         |               |              |
| 7 DI/DDF-EOT+CM                           | 19.557 *       | 412.987 (5)* | 3.851 *      | 12.139 *      | 3.931 *       | 58.788 (1)*   |              |
| 8 DDF-DIF-EOT+CM                          | 23.390 *       | 18.140 *     | 379.208 (5)* | 17.792 *      | 12.567 *      | 207.345 (3)*  | 153.496 (2)* |
| 9 DI/DDF-IM-PT+CM                         | 19.796 *       | 12.906 *     | 4.532 *      | 4648.353 (5)* | 4.598 *       | 159.762 (3)*  | 80.239 (2)*  |
| 10 DDF-DIF-IM-PT+CM                       | 23.599 *       | 18.311*      | 13.183 *     | 18.021 *      | 2515.509 (5)* | 367.619 (6)*  | 312.622 (5)* |
| C. Bifactor Model                         |                |              |              |               |               |               |              |
| 11 DI/DDF-EOT+BF                          | 1152.331 (20)* | 20.043 *     | 13.420 *     | 20.073 *      | 13.453 *      | 10.906 *      | 6.006 *      |
| 12 DDF-DIF-EOT+BF                         | 927.763 (20)*  | 20.955 *     | 16.410 *     | 20.999*       | 16.379 *      | 11.655 *      | 6.812 *      |
| 13 DI/DDF-IM-PT+BF                        | 1084.514 (20)* | 13.976 *     | 7.992 *      | 14.393*       | 8.375 *       | 5.866 *       | 2.201*       |
| 14 DDF-DIF-IM-PT+BF                       | 937.253 (20)*  | 14.905*      | 9.949 *      | 15.333*       | 10.420 *      | 6.626 *       | 2.925 *      |
| D. Bifactor + Common Methods Factor Model |                |              |              |               |               |               |              |
| 15 DI/DDF-EOT+BF+CM                       | 1580.320 (25)* | 23.728 *     | 18.139 *     | 23.336*       | 17.852 *      | 770.599 (20)* | 19.848 *     |
| 16 DDF-DIF-EOT+BF+CM                      | 1532.426 (25)* | 23.895*      | 19.124 *     | 23.526 *      | 18.802*       | 743.063 (20)* | 20.142 *     |
| 17 DI/DDF-IM-PT+BF+CM                     | 1567.636 (25)* | 23.474 *     | 17.908 *     | 23.208 *      | 17.711 *      | 755.127 (20)* | 17.711 *     |
| 18 DDF-DIF-IM-PT+BF+CM                    | 1543.497 (25)* | 23.576 *     | 18.863 *     | 23.339 *      | 18.649 *      | 743.126 (20)* | 18.002 *     |

*Table Continues.*

**Table S1. Continued.**

|                                           | 8                   | 9              | 10              | 11       | 12              | 13               | 14              | 15               | 16       | 17     |       |
|-------------------------------------------|---------------------|----------------|-----------------|----------|-----------------|------------------|-----------------|------------------|----------|--------|-------|
| A. Correlated Latent Factor Model         |                     |                |                 |          |                 |                  |                 |                  |          |        |       |
| 1                                         | ALEX                |                |                 |          |                 |                  |                 |                  |          |        |       |
| 2                                         | DI/DDF-EOT          |                |                 |          |                 |                  |                 |                  |          |        |       |
| 3                                         | DDF-DIF-EOT         |                |                 |          |                 |                  |                 |                  |          |        |       |
| 4                                         | DI/DDF-IM-PT        |                |                 |          |                 |                  |                 |                  |          |        |       |
| 5                                         | DDF-DIF-IM-PT       |                |                 |          |                 |                  |                 |                  |          |        |       |
| B. Common Method Factor Model             |                     |                |                 |          |                 |                  |                 |                  |          |        |       |
| 6                                         | ALEX+CM             |                |                 |          |                 |                  |                 |                  |          |        |       |
| 7                                         | DI/DDF-EOT+CM       |                |                 |          |                 |                  |                 |                  |          |        |       |
| 8                                         | DDF-DIF-EOT+CM      |                |                 |          |                 |                  |                 |                  |          |        |       |
| 9                                         | DI/DDF-IM-PT+CM     | -9.900*        |                 |          |                 |                  |                 |                  |          |        |       |
| 10                                        | DDF-DIF-IM-PT+CM    | 95.198<br>(3)* | 205.770<br>(3)* |          |                 |                  |                 |                  |          |        |       |
| C. Bifactor Model                         |                     |                |                 |          |                 |                  |                 |                  |          |        |       |
| 11                                        | DI/DDF-EOT+BF       | -0.674         | 5.071 *         | -1.637   |                 |                  |                 |                  |          |        |       |
| 12                                        | DDF-DIF-EOT+BF      | 0.265          | 5.862 *         | -0.794   | 2.196*          |                  |                 |                  |          |        |       |
| 13                                        | DI/DDF-IM-PT+BF     | -3.740 *       | 1.455           | -4.539 * | -8.841*         | -7.789*          |                 |                  |          |        |       |
| 14                                        | DDF-DIF-IM-PT+BF    | -3.164 *       | 2.169 *         | -4.017 * | -4.857 *        | -8.942*          | 2.196*          |                  |          |        |       |
| D. Bifactor + Common Methods Factor Model |                     |                |                 |          |                 |                  |                 |                  |          |        |       |
| 15                                        | DI/DDF-EOT+BF+CM    | 12.976 *       | 19.174 *        | 11.922 * | 478.484<br>(5)* | 11.061 *         | 14.446 *        | 12.512 *         |          |        |       |
| 16                                        | DDF-DIF-EOT+BF+CM   | 15.119 *       | 19.337 *        | 13.749 * | 12.857 *        | 1308.484<br>(5)* | 13.743 *        | 13.645*          | 0.379    |        |       |
| 17                                        | DI/DDF-IM-PT+BF+CM  | 11.098 *       | 17.629 *        | 10.588 * | 13.936 *        | 10.658 *         | 509.713<br>(5)* | 12.511 *         | -2.153 * | -1.481 |       |
| 18                                        | DDF-DIF-IM-PT+BF+CM | 12.675 *       | 17.898 *        | 12.261 * | 12.714 *        | 12.490 *         | 13.972 *        | 1957.304<br>(5)* | -0.782   | -1.898 | 0.519 |

\* $p < .05$ .

**Note:** Figures in orange = non-nested model pairwise comparisons using Vuong (1989)  $z$ -test. A significant Vuong test ( $p < .05$ ) indicates that the model with a smaller BIC is better compared to the model with a larger BIC. Figures in blue = nested model comparisons using  $-2\Delta LL_{\text{corrected}} (\Delta df)$ .

**Table S2**  
*Nested and Non-nested Pairwise Model Comparisons for the Philippines Sample*

|                                          | 1            | 2           | 3           | 4            | 5       | 6           | 7          | 8          |
|------------------------------------------|--------------|-------------|-------------|--------------|---------|-------------|------------|------------|
| A. Correlated Latent Factor Model        |              |             |             |              |         |             |            |            |
| 1 ALEX                                   |              |             |             |              |         |             |            |            |
| 2 DI/DDF-EOT                             | 11.204 (1)*  |             |             |              |         |             |            |            |
| 3 DDF-DIF-EOT                            | 31.667 (3)*  | 17.245 (2)* |             |              |         |             |            |            |
| 4 DI/DDF-IM-PT                           | 21.716 (3)*  | 6.115 (2)*  | 0.017       |              |         |             |            |            |
| 5 DDF-DIF-IM-PT                          | 43.027 (4)*  | 21.325 (5)* | 8.693 (3)*  | 20.615 (3) * |         |             |            |            |
| B. Common Method Factor Model            |              |             |             |              |         |             |            |            |
| 6 ALEX+CM                                | 159.932 (5)* | 5.795 *     | 5.140 *     | 5.083 *      | 4.740 * |             |            |            |
| 7 DI/DDF-EOT+CM                          | 8.056 *      | 339.03 (5)* | 6.496 *     | 6.501 *      | 6.128 * | 15.54 (1)*  |            |            |
| 8 DDF-DIF-EOT+CM                         | 8.180 *      | 7.190 *     | 253.85 (5)* | 6.657 *      | 6.489 * | 29.30 (3)*  | 8.86 (2)*  |            |
| 9 DI/DDF-IM-PT+CM                        | 7.978 *      | 7.175 *     | 6.538 *     | 4126.68 (5)* | 6.158 * | 24.80 (3)*  | 6.31 (2)*  |            |
| 10 DDF-DIF-IM-PT+CM                      | 8.304 *      | 7.400 *     | 7.060 *     | 6.904 *      | N/A     | 55.18 (6)*  | 32.33 (5)* | 24.73 (3)* |
| C. Bifactor Model                        |              |             |             |              |         |             |            |            |
| 11 DI/DDF-EOT+BF                         | 195.06 (20)* | 4.660 *     | 4.128 *     | 3.935 *      | 3.736 * | -0.555      | -3.612 *   | -3.611 *   |
| 12 DDF-DIF-EOT+BF                        | 162.10 (20)* | 2.907 *     | 2.445 *     | 2.630 *      | 2.466 * | -4.349 *    | -5.982 *   | -6.343 *   |
| D. Bifactor + Common Method Factor Model |              |             |             |              |         |             |            |            |
| 13 DI/DDF-EOT+ BF+CM                     | 232.13 (25)* | 5.138 *     | 4.626 *     | 4.764 *      | 4.506 * | 86.95 (20)* | -1.567     | -1.624     |
| 14 DDF-DIF-EOT+BF+CM                     | 237.04 (25)* | 5.147 *     | 4.775 *     | 4.678 *      | 4.524 * | 85.89 (20)* | -2.760 *   | -3.100 *   |
| 15 DDF-DIF-IM-PT+BF+CM                   | 202.17 (25)* | 3.656 *     | 3.293 *     | 3.368 *      | 3.237 * | 56.54 (20)* | -5.094 *   | -5.480 *   |

*Table Continues.*

**Table S2. Continued.**

|                                          | 9                   | 10         | 11       | 12         | 13         | 14       |
|------------------------------------------|---------------------|------------|----------|------------|------------|----------|
| A. Correlated Latent Factor Model        |                     |            |          |            |            |          |
| 1                                        | ALEX                |            |          |            |            |          |
| 2                                        | DI/DDF-EOT          |            |          |            |            |          |
| 3                                        | DDF-DIF-EOT         |            |          |            |            |          |
| 4                                        | DI/DDF-IM-PT        |            |          |            |            |          |
| 5                                        | DDF-DIF-IM-PT       |            |          |            |            |          |
| B. Common Method Factor Model            |                     |            |          |            |            |          |
| 6                                        | ALEX+CM             |            |          |            |            |          |
| 7                                        | DI/DDF-EOT+CM       |            |          |            |            |          |
| 8                                        | DDF-DIF-EOT+CM      |            |          |            |            |          |
| 9                                        | DI/DDF-IM-PT+CM     |            |          |            |            |          |
| 10                                       | DDF-DIF-IM-PT+CM    | 35.09 (3)* |          |            |            |          |
| C. Bifactor Model                        |                     |            |          |            |            |          |
| 11                                       | DI/DDF-EOT+BF       | -3.553 *   | -4.091 * |            |            |          |
| 12                                       | DDF-DIF-EOT+BF      | -5.914 *   | -6.568 * | -3.089 *   |            |          |
| D. Bifactor + Common Method Factor Model |                     |            |          |            |            |          |
| 13                                       | DI/DDF-EOT+ BF+CM   | -1.568     | -2.231 * | 36.95 (5)* | 4.252 *    |          |
| 14                                       | DDF-DIF-EOT+BF+CM   | -2.966 *   | -4.007 * | 1.073      | 78.20 (5)* | -0.578   |
| 15                                       | DDF-DIF-IM-PT+BF+CM | -4.869 *   | -5.704 * | -1.342     | 2.695 *    | -3.139 * |

\*  $p < .05$ .

**Note:** Figures in orange = non-nested model pairwise comparisons using Vuong (1989)  $z$ -test. A significant Vuong test ( $p < .05$ ) indicates that the model with a smaller BIC is better compared to the model with a larger BIC. Figures in blue = nested model comparisons using  $-2\Delta LL_{corrected}$  ( $\Delta df$ ). The DI/DDF-IM-PT+BF, DDF-DIF-IM-PT+BF, and DI/DDF-IM-PT+BF+CM models were not included because the models resulted in a lack of convergence. N/A =  $-2\Delta LL_{corrected}$  resulted in a negative statistic, which is non-interpretable.

**Table S3**  
*Standardized Parameter Estimates for the Correlated Latent Factor Models – U.S. Sample*

| Item      | ALEX Model | DI/DDF-EOT Model |        | DIF-DDF-EOT Model |        |        | DI/DDF-PT-IM Model |        |       | DIF-DDF-PT-IM Model |        |        |       |
|-----------|------------|------------------|--------|-------------------|--------|--------|--------------------|--------|-------|---------------------|--------|--------|-------|
|           | ALEX       | DI/DDF           | EOT    | DDF               | DIF    | EOT    | DI/DDF             | IM     | PT    | DDF                 | DIF    | IM     | PT    |
| 02        | .738*      | .741*            |        | .809*             |        |        | .741*              |        |       | .809*               |        |        |       |
| 04        | .524*      | .527*            |        | .614*             |        |        | .527*              |        |       | .614*               |        |        |       |
| 11        | .655*      | .653*            |        | .685*             |        |        | .653*              |        |       | .685*               |        |        |       |
| 12        | .563*      | .560*            |        | .627*             |        |        | .560*              |        |       | .627*               |        |        |       |
| 17        | .493*      | .486*            |        | .548*             |        |        | .486*              |        |       | .549*               |        |        |       |
| 01        | .774*      | .777*            |        |                   | .765*  |        | .777*              |        |       |                     | .765*  |        |       |
| 03        | .565*      | .564*            |        |                   | .592*  |        | .564*              |        |       |                     | .592*  |        |       |
| 06        | .706*      | .705*            |        |                   | .712*  |        | .705*              |        |       |                     | .712*  |        |       |
| 07        | .665*      | .663*            |        |                   | .696*  |        | .663*              |        |       |                     | .696*  |        |       |
| 09        | .782*      | .784*            |        |                   | .785*  |        | .784*              |        |       |                     | .786*  |        |       |
| 13        | .791*      | .793*            |        |                   | .812*  |        | .793*              |        |       |                     | .812*  |        |       |
| 14        | .679*      | .678*            |        |                   | .699*  |        | .678*              |        |       |                     | .699*  |        |       |
| 05        | -.002      |                  | .428*  |                   |        | .428*  |                    |        | .535* |                     |        |        | .533* |
| 08        | .206*      |                  | .184*  |                   |        | .184*  |                    |        | .259* |                     |        |        | .261* |
| 10        | .116*      |                  | .672*  |                   |        | .673*  |                    | .672*  |       |                     | .673*  |        |       |
| 15        | .155*      |                  | .072   |                   |        | .074   |                    | .071   |       |                     | .074   |        |       |
| 16        | .100*      |                  | .002   |                   |        | .003   |                    | .000   |       |                     | .002   |        |       |
| 18        | .075*      |                  | .582*  |                   |        | .581*  |                    | .582*  |       |                     | .581*  |        |       |
| 19        | .091*      |                  | .762*  |                   |        | .761*  |                    | .765*  |       |                     | .765*  |        |       |
| 20        | .246*      |                  | .064   |                   |        | .064   |                    |        | .116  |                     |        |        | .117  |
| <i>m</i>  | 47.325     | 27.828           | 19.528 | 12.985            | 14.863 | 19.528 | 27.828             | 12.237 | 7.295 | 12.985              | 14.863 | 12.237 | 7.295 |
| <i>sd</i> | 10.580     | 8.975            | 3.808  | 4.215             | 5.561  | 3.808  | 8.975              | 2.748  | 1.913 | 4.215               | 5.561  | 2.748  | 1.913 |
| <i>α</i>  | .851       | .902             | .551   | .791              | .886   | .551   | .902               | .497   | .284  | .791                | .886   | .497   | .284  |
| <i>ω</i>  | .856       | .903             | .539   | .791              | .888   | .518   | .903               | .518   | .233  | .792                | .888   | .519   | .330  |

| Latent Factor Correlations |       |   |       |       |   |       |       |   |       |       |       |   |
|----------------------------|-------|---|-------|-------|---|-------|-------|---|-------|-------|-------|---|
| 1                          |       |   |       |       |   |       |       |   |       |       |       |   |
| 2                          | .131* | 1 |       |       |   |       |       |   |       |       |       |   |
| 3                          |       |   | .835* | 1     |   |       |       |   |       |       |       |   |
| 4                          |       |   | .147* | .120* | 1 |       |       |   |       |       |       |   |
|                            |       |   |       |       |   | .126* | 1     |   |       |       |       |   |
|                            |       |   |       |       |   | .151  | .759* | 1 |       |       |       |   |
|                            |       |   |       |       |   |       |       |   | .835* | 1     |       |   |
|                            |       |   |       |       |   |       |       |   | .145* | .114* | 1     |   |
|                            |       |   |       |       |   |       |       |   | .141  | .151  | .760* | 1 |

\*  $p < .05$ .

Note: ALEX = Alexithymia; DI/DDF = Difficulty Identifying/Difficulty Describing Feelings; DDF = Difficulty Describing Feelings; DIF = Difficulty Identifying Feelings; EOT = Externally-Oriented Thinking; IM = Importance of Emotions; PT = Pragmatic Thinking.



**Table S4*****Standardized Parameter Estimates for the Correlated Latent Factor Models – Philippines Sample***

| Item      | ALEX Model | DI/DDF-EOT Model |        | DIF-DDF-EOT Model |        |        | DI/DDF-PT-IM Model |        |       | DIF-DDF-PT-IM Model |        |        |       |
|-----------|------------|------------------|--------|-------------------|--------|--------|--------------------|--------|-------|---------------------|--------|--------|-------|
|           | ALEX       | DI/DDF           | EOT    | DDF               | DIF    | EOT    | DI/DDF             | IM     | PT    | DDF                 | DIF    | IM     | PT    |
| 02        | .738*      | .740*            |        | .763*             |        |        | .738*              |        |       | .764*               |        |        |       |
| 04        | .514*      | .527*            |        | .564*             |        |        | .520*              |        |       | .559*               |        |        |       |
| 11        | .686*      | .685*            |        | .706*             |        |        | .686*              |        |       | .706*               |        |        |       |
| 12        | .542*      | .538*            |        | .549*             |        |        | .540*              |        |       | .550*               |        |        |       |
| 17        | .480*      | .478*            |        | .490*             |        |        | .477*              |        |       | .492*               |        |        |       |
| 01        | .775*      | .780*            |        |                   | .784*  |        | .778*              |        |       |                     | .781*  |        |       |
| 03        | .482*      | .479*            |        |                   | .486*  |        | .484*              |        |       |                     | .491*  |        |       |
| 06        | .603*      | .598*            |        |                   | .601*  |        | .601*              |        |       |                     | .604*  |        |       |
| 07        | .558*      | .554*            |        |                   | .565*  |        | .557*              |        |       |                     | .567*  |        |       |
| 09        | .745*      | .746*            |        |                   | .754*  |        | .746*              |        |       |                     | .754*  |        |       |
| 13        | .781*      | .783*            |        |                   | .788*  |        | .783*              |        |       |                     | .785*  |        |       |
| 14        | .628*      | .624*            |        |                   | .627*  |        | .627*              |        |       |                     | .630*  |        |       |
| 05        | .031       |                  | .444*  |                   |        | .452*  |                    |        | .109  |                     |        |        | .076  |
| 08        | .311*      |                  | .110   |                   |        | .101   |                    |        | .465* |                     |        |        | .467* |
| 10        | -.077      |                  | .431*  |                   |        | .429*  |                    | .398*  |       |                     |        | .411*  |       |
| 15        | .072       |                  | -.044  |                   |        | -.035  |                    | -.011  |       |                     |        | .001   |       |
| 16        | .154*      |                  | .027   |                   |        | .033   |                    | .031   |       |                     |        | .037   |       |
| 18        | -.111      |                  | .482*  |                   |        | .493*  |                    | .434*  |       |                     |        | .457*  |       |
| 19        | .038       |                  | .734*  |                   |        | .720*  |                    | .816*  |       |                     |        | .778*  |       |
| 20        | .323*      |                  | -.115  |                   |        | -.121  |                    |        | .416* |                     |        |        | .430* |
| <i>m</i>  | 56.321     | 35.995           | 20.356 | 15.637            | 20.397 | 20.356 | 35.995             | 12.705 | 7.649 | 15.637              | 20.397 | 12.705 | 7.649 |
| <i>sd</i> | 9.743      | 8.373            | 3.328  | 3.686             | 5.264  | 3.328  | 8.373              | 2.366  | 1.780 | 3.686               | 5.264  | 2.366  | 1.780 |
| <i>α</i>  | .833       | .888             | .450   | .750              | .848   | .450   | .888               | .360   | .225  | .750                | .848   | .360   | .225  |
| <i>ω</i>  | .838       | .888             | .337   | .749              | .847   | .338   | .888               | .379   | .293  | .749                | .848   | .384   | .290  |

| Latent Factor Correlations |      |   |       |       |   |       |      |   |       |       |      |   |
|----------------------------|------|---|-------|-------|---|-------|------|---|-------|-------|------|---|
| 1                          | 1    |   |       |       |   |       |      |   |       |       |      |   |
| 2                          | .011 | 1 |       |       |   |       |      |   |       |       |      |   |
| 3                          |      |   | .935* | 1     |   |       |      |   |       |       |      |   |
| 4                          |      |   | .058  | -.054 | 1 |       |      |   |       |       |      |   |
|                            |      |   |       |       |   | .687* | .144 | 1 |       |       |      |   |
|                            |      |   |       |       |   |       |      |   | .935* | 1     |      |   |
|                            |      |   |       |       |   |       |      |   | .056  | -.039 | 1    |   |
|                            |      |   |       |       |   |       |      |   | .599* | .709* | .096 | 1 |

\*  $p < .05$ .

Note: ALEX = Alexithymia; DI/DDF = Difficulty Identifying/Difficulty Describing Feelings; DDF = Difficulty Describing Feelings; DIF = Difficulty Identifying Feelings; EOT = Externally-Oriented Thinking; IM = Importance of Emotions; PT = Pragmatic Thinking.

**Table S5**

*Standardized Parameter Estimates for the Common Method Factor Models – U.S. Sample*

| Item | ALEX+CM Model |       | DI/DDF-EOT+CM Model |       |       | DIF-DDF-EOT+CM Model |       |       |       | DI/DDF-PT-IM+CM Model |       |       |       | DIF-DDF-PT-IM+CM Model |       |    |       |       |
|------|---------------|-------|---------------------|-------|-------|----------------------|-------|-------|-------|-----------------------|-------|-------|-------|------------------------|-------|----|-------|-------|
|      | ALEX          | CM    | DI/DDF              | EOT   | CM    | DDF                  | DIF   | EOT   | CM    | DI/DDF                | IM    | PT    | CM    | DDF                    | DIF   | IM | PT    | CM    |
| 02   | .744*         |       | .746*               |       |       | .823*                |       |       |       | .745*                 |       |       |       | .820*                  |       |    |       |       |
| 04   | .519*         | .356* | .520*               |       | .378* | .612*                |       |       | .392* | .510*                 |       |       | .372* | .601*                  |       |    |       | .383* |
| 11   | .657*         |       | .656*               |       |       | .684*                |       |       |       | .657*                 |       |       |       | .684*                  |       |    |       |       |
| 12   | .564*         |       | .563*               |       |       | .625*                |       |       |       | .562*                 |       |       |       | .627*                  |       |    |       |       |
| 17   | .492*         |       | .491*               |       |       | .549*                |       |       |       | .489*                 |       |       |       | .554*                  |       |    |       |       |
| 01   | .776*         |       | .777*               |       |       |                      | .765* |       |       | .777*                 |       |       |       |                        | .765* |    |       |       |
| 03   | .561*         |       | .559*               |       |       |                      | .591* |       |       | .560*                 |       |       |       |                        | .591* |    |       |       |
| 06   | .708*         |       | .707*               |       |       |                      | .714* |       |       | .707*                 |       |       |       |                        | .714* |    |       |       |
| 07   | .661*         |       | .659*               |       |       |                      | .696* |       |       | .660*                 |       |       |       |                        | .696* |    |       |       |
| 09   | .786*         |       | .787*               |       |       |                      | .788* |       |       | .787*                 |       |       |       |                        | .787* |    |       |       |
| 13   | .789*         |       | .789*               |       |       |                      | .810* |       |       | .789*                 |       |       |       |                        | .810* |    |       |       |
| 14   | .676*         |       | .674*               |       |       |                      | .698* |       |       | .675*                 |       |       |       |                        | .698* |    |       |       |
| 05   | -.022         | .463* |                     | .073  | .456* |                      |       | .082  | .465* |                       |       | .049  | .457* |                        |       |    | .063  | .466* |
| 08   | .201*         |       |                     | .434* |       |                      |       | .433* |       |                       |       | .452* |       |                        |       |    | .465* |       |
| 10   | .092*         | .693* |                     | .159* | .684* |                      |       | .183* | .681* |                       | .110* |       | .692* |                        | .133* |    |       | .690* |
| 15   | .154*         |       |                     | .471* |       |                      |       | .481* |       |                       | .590* |       |       |                        | .640* |    |       |       |
| 16   | .100*         |       |                     | .460* |       |                      |       | .457* |       |                       | .557* |       |       |                        | .514* |    |       |       |
| 18   | .053          | .573* |                     | .074  | .574* |                      |       | .093  | .571* |                       | .032  |       | .578* |                        | .044  |    |       | .577* |
| 19   | .065*         | .723* |                     | .179* | .708* |                      |       | .204* | .698* |                       | .123* |       | .719* |                        | .147* |    |       | .711* |
| 20   | .245*         |       |                     | .382* |       |                      |       | .376* |       |                       |       | .450* |       |                        |       |    | .442* |       |

  

| Latent Factor Correlations |  |       |   |  |  |       |       |   |  |       |       |   |  |       |       |       |   |  |  |
|----------------------------|--|-------|---|--|--|-------|-------|---|--|-------|-------|---|--|-------|-------|-------|---|--|--|
|                            |  |       |   |  |  |       |       |   |  |       |       |   |  |       |       |       |   |  |  |
|                            |  | 1     |   |  |  | 1     |       |   |  | 1     |       |   |  | 1     |       |       |   |  |  |
|                            |  | .373* | 1 |  |  | .827* | 1     |   |  | .222* | 1     |   |  | .827* | 1     |       |   |  |  |
|                            |  |       |   |  |  | .364* | .352* | 1 |  | .474* | .592* | 1 |  | .279* | .188* | 1     |   |  |  |
|                            |  |       |   |  |  |       |       |   |  |       |       |   |  | .392* | .469* | .188* | 1 |  |  |

\* $p < .05$ .

Note: ALEX = Alexithymia; DI/DDF = Difficulty Identifying/Difficulty Describing Feelings; DDF = Difficulty Describing Feelings; DIF = Difficulty Identifying Feelings; EOT = Externally-Oriented Thinking; IM = Importance of Emotions; PT = Pragmatic Thinking; CM = Common Method Factor – latent factor for negatively worded items.

**Table S6**  
**Standardized Parameter Estimates for the Common Method Factor Models – Philippines Sample**

| Item                       | ALEX+CM Model |       | DI/DDF-EOT+CM Model |       |       | DIF-DDF-EOT+CM Model |       |       |       | DI/DDF-PT-IM+CM Model |        |       | DIF-DDF-PT-IM+CM Model |       |       |        |    |       |       |
|----------------------------|---------------|-------|---------------------|-------|-------|----------------------|-------|-------|-------|-----------------------|--------|-------|------------------------|-------|-------|--------|----|-------|-------|
|                            | ALEX          | CM    | DI/DDF              | EOT   | CM    | DDF                  | DIF   | EOT   | CM    | DI/DDF                | IM     | PT    | CM                     | DDF   | DIF   | IM     | PT | CM    |       |
| 02                         | .744*         |       | .741*               |       |       | .767*                |       |       |       | .740*                 |        |       |                        | .762* |       |        |    |       |       |
| 04                         | .519*         | .356* | .534*               |       | .358* | .558*                |       |       | .357* | .533*                 |        |       | .361*                  | .554* |       |        |    | .359* |       |
| 11                         | .657*         |       | .686*               |       |       | .707*                |       |       |       | .685*                 |        |       |                        | .704* |       |        |    |       |       |
| 12                         | .564*         |       | .542*               |       |       | .555*                |       |       |       | .540*                 |        |       |                        | .561* |       |        |    |       |       |
| 17                         | .492*         |       | .481*               |       |       | .493*                |       |       |       | .478*                 |        |       |                        | .503* |       |        |    |       |       |
| 01                         | .776*         |       | .777*               |       |       |                      | .781* |       |       | .778*                 |        |       |                        |       | .782* |        |    |       |       |
| 03                         | .561*         |       | .480*               |       |       |                      | .488* |       |       | .483*                 |        |       |                        |       | .494* |        |    |       |       |
| 06                         | .708*         |       | .603*               |       |       |                      | .604* |       |       | .603*                 |        |       |                        |       | .603* |        |    |       |       |
| 07                         | .661*         |       | .556*               |       |       |                      | .567* |       |       | .557*                 |        |       |                        |       | .566* |        |    |       |       |
| 09                         | .786*         |       | .747*               |       |       |                      | .752* |       |       | .749*                 |        |       |                        |       | .756* |        |    |       |       |
| 13                         | .789*         |       | .781*               |       |       |                      | .787* |       |       | .781*                 |        |       |                        |       | .784* |        |    |       |       |
| 14                         | .676*         |       | .625*               |       |       |                      | .631* |       |       | .625*                 |        |       |                        |       | .627* |        |    |       |       |
| 05                         | -.022         | .463* |                     | .066  | .518* |                      |       | .067  | .519* |                       |        | .037  | .515*                  |       |       |        |    | .017  | .519* |
| 08                         | .201*         |       |                     | .540* |       |                      |       | .544* |       |                       |        | .469* |                        |       |       |        |    | .471* |       |
| 10                         | .092*         | .693* |                     | -.009 | .466* |                      |       | -.007 | .469* |                       | .028   |       | .468*                  |       |       | .004   |    | .470* |       |
| 15                         | .154*         |       |                     | .301* |       |                      |       | .298* |       |                       | .343*  |       |                        |       | .390* |        |    |       |       |
| 16                         | .100*         |       |                     | .376* |       |                      |       | .373* |       |                       | .382*  |       |                        |       | .394* |        |    |       |       |
| 18                         | .053          | .575* |                     | -.116 | .473* |                      |       | -.115 | .471* |                       | -.092  |       | .472*                  |       | -.064 |        |    | .468* |       |
| 19                         | .065*         | .723* |                     | .109  | .656* |                      |       | .112  | .655* |                       | .113   |       | .656*                  |       | .098  |        |    | .650* |       |
| 20                         | .245*         |       |                     | .501* |       |                      |       | .500* |       |                       |        | .444* |                        |       |       |        |    | .437* |       |
| Latent Factor Correlations |               |       |                     |       |       |                      |       |       |       |                       |        |       |                        |       |       |        |    |       |       |
|                            |               |       | 1                   |       |       | 1                    |       |       |       | 1                     |        |       |                        | 1     |       |        |    |       |       |
|                            |               |       | .523*               | 1     |       | .936*                | 1     |       |       | .316                  | 1      |       |                        | .937* | 1     |        |    |       |       |
|                            |               |       |                     |       |       | .497*                | .524* | 1     |       | .673*                 | 1.245* | 1     |                        | .398* | .217  | 1      |    |       |       |
|                            |               |       |                     |       |       |                      |       |       |       |                       |        |       |                        | .583* | .708* | 1.171* | 1  |       |       |

\* $p < .05$ .

Note: ALEX = Alexithymia; DI/DDF = Difficulty Identifying/Difficulty Describing Feelings; DDF = Difficulty Describing Feelings; DIF = Difficulty Identifying Feelings; EOT = Externally-Oriented Thinking; IM = Importance of Emotions; PT = Pragmatic Thinking; CM = Common Method Factor – latent factor for negatively worded items.

**Table S7**  
**Standardized Parameter Estimates for the Bifactor Models – U.S. Sample**

| Item                   | DI/DDF-EOT+BF Model |       |       | DIF-DDF-EOT+BF Model |       |       |       | DI/DDF-PT-IM+BF Model |       |      |       | DIF-DDF-PT-IM+BF Model |       |       |      |       |
|------------------------|---------------------|-------|-------|----------------------|-------|-------|-------|-----------------------|-------|------|-------|------------------------|-------|-------|------|-------|
|                        | DI/DDF              | EOT   | BF    | DDF                  | DIF   | EOT   | BF    | DI/DDF                | IM    | PT   | BF    | DDF                    | DIF   | IM    | PT   | BF    |
| 02                     | .507*               |       | .693* | .242                 |       |       | .776* | .499*                 |       |      | .698* | .230                   |       |       |      | .779* |
| 04                     | .416*               |       | .468* | .320                 |       |       | .524* | .410*                 |       |      | .474* | .301                   |       |       |      | .529* |
| 11                     | .229*               |       | .619* | .202*                |       |       | .645* | .223*                 |       |      | .621* | .205*                  |       |       |      | .644* |
| 12                     | .248*               |       | .527* | .408*                |       |       | .525* | .243*                 |       |      | .529* | .419*                  |       |       |      | .524* |
| 17                     | .221*               |       | .459* | .395*                |       |       | .452* | .217*                 |       |      | .461* | .402*                  |       |       |      | .452* |
| 01                     | .292*               |       | .741* |                      | .042  |       | .816* | .284*                 |       |      | .745* |                        | .045  |       |      | .817* |
| 03                     | -.278*              |       | .640* |                      | .587* |       | .433* | -.286*                |       |      | .638* |                        | .588* |       |      | .431* |
| 06                     | .051                |       | .704* |                      | .223* |       | .678* | .044                  |       |      | .705* |                        | .227* |       |      | .676* |
| 07                     | -.330*              |       | .756* |                      | .684* |       | .525* | -.339*                |       |      | .753* |                        | .687* |       |      | .522* |
| 09                     | .131                |       | .764* |                      | .170* |       | .773* | .123                  |       |      | .765* |                        | .174* |       |      | .771* |
| 13                     | -.025               |       | .800* |                      | .327* |       | .725* | -.033                 |       |      | .800* |                        | .331* |       |      | .723* |
| 14                     | -.076               |       | .693* |                      | .308* |       | .613* | -.083                 |       |      | .692* |                        | .312* |       |      | .611* |
| 05                     |                     | .436* | -.012 |                      |       | .435* | -.027 |                       |       | .141 | -.008 |                        |       |       | .150 | -.023 |
| 08                     |                     | .148* | .207* |                      |       | .159* | .195* |                       |       | .939 | .205* |                        |       |       | .895 | .191* |
| 10                     |                     | .662* | .105* |                      |       | .666* | .079* |                       | .650* |      | .107* |                        |       | .655* |      | .083* |
| 15                     |                     | .042  | .141* |                      |       | .050  | .148* |                       | .041  |      | .141* |                        |       | .048  |      | .147* |
| 16                     |                     | -.022 | .096* |                      |       | -.015 | .099* |                       | -.038 |      | .095* |                        |       | -.032 |      | .098* |
| 18                     |                     | .579* | .077* |                      |       | .583* | .028  |                       | .583* |      | .078* |                        |       | .588* |      | .030  |
| 19                     |                     | .760* | .083* |                      |       | .763* | .050  |                       | .769* |      | .084* |                        |       | .771* |      | .053  |
| 20                     |                     | .019  | .246* |                      |       | .032  | .239* |                       |       | .155 | .244* |                        |       |       | .168 | .235* |
| ECV                    | .125                | .154  | .721  | .079                 | .115  | .274  | .656  | .112                  | .121  | .101 | .665  | .073                   | .109  | .119  | .091 | .608  |
| $\omega$               | .915                | .528  | .881  | .802                 | .903  | .529  | .882  | .915                  | .515  | .477 | .887  | .802                   | .903  | .515  | .454 | .886  |
| $\omega_H/\omega_{HS}$ | .036                | .461  | .801  | .182                 | .174  | .479  | .743  | .032                  | .481  | .423 | .817  | .180                   | .178  | .493  | .409 | .755  |

\*  $p < .05$ .

Note: DI/DD = Difficulty Identifying/Difficulty Describing Feelings; DDF = Difficulty Describing Feelings; DIF = Difficulty Identifying Feelings; EOT = Externally-Oriented Thinking; IM = Importance of Emotions; PT = Pragmatic Thinking; BF = Alexithymia General Factor; ECV = Explained Common Variance.



**Table S8**  
**Standardized Parameter Estimates for the Bifactor Models – Philippines Sample**

| Item                   | DI/DDF-EOT+BF Model |       |        | DIF-DDF-EOT+BF Model |       |       |       | DI/DDF-PT-IM+BF Model <sup>a</sup> |    |    |      | DIF-DDF-PT-IM+BF Model <sup>a</sup> |     |    |    |      |
|------------------------|---------------------|-------|--------|----------------------|-------|-------|-------|------------------------------------|----|----|------|-------------------------------------|-----|----|----|------|
|                        | DI/DDF              | EOT   | BF     | DDF                  | DIF   | EOT   | BF    | DI/DDF                             | IM | PT | ALEX | DDF                                 | DIF | IM | PT | ALEX |
| 02                     | .701*               |       | .272*  | .233                 |       |       | .741* |                                    |    |    |      |                                     |     |    |    |      |
| 04                     | .687*               |       | -.147* | .524                 |       |       | .491* |                                    |    |    |      |                                     |     |    |    |      |
| 11                     | .608*               |       | .315*  | .064                 |       |       | .687* |                                    |    |    |      |                                     |     |    |    |      |
| 12                     | .427*               |       | .353*  | .003                 |       |       | .539* |                                    |    |    |      |                                     |     |    |    |      |
| 17                     | .404*               |       | .266*  | .066                 |       |       | .482* |                                    |    |    |      |                                     |     |    |    |      |
| 01                     | .720*               |       | .302*  |                      | .054  |       | .774* |                                    |    |    |      |                                     |     |    |    |      |
| 03                     | .378*               |       | .307*  |                      | .471* |       | .432* |                                    |    |    |      |                                     |     |    |    |      |
| 06                     | .472*               |       | .400*  |                      | -.027 |       | .616* |                                    |    |    |      |                                     |     |    |    |      |
| 07                     | .425*               |       | .379*  |                      | .427* |       | .516* |                                    |    |    |      |                                     |     |    |    |      |
| 09                     | .652*               |       | .363*  |                      | .035  |       | .749* |                                    |    |    |      |                                     |     |    |    |      |
| 13                     | .687*               |       | .361*  |                      | .244* |       | .759* |                                    |    |    |      |                                     |     |    |    |      |
| 14                     | .520*               |       | .348*  |                      | .108  |       | .621* |                                    |    |    |      |                                     |     |    |    |      |
| 05                     |                     | .396* | -.266  |                      |       | .440* | .022  |                                    |    |    |      |                                     |     |    |    |      |
| 08                     |                     | .351* | .456*  |                      |       | .124  | .316* |                                    |    |    |      |                                     |     |    |    |      |
| 10                     |                     | .376* | -.212  |                      |       | .425* | -.090 |                                    |    |    |      |                                     |     |    |    |      |
| 15                     |                     | .112  | .314*  |                      |       | -.040 | .084  |                                    |    |    |      |                                     |     |    |    |      |
| 16                     |                     | .182  | .293*  |                      |       | .033  | .162* |                                    |    |    |      |                                     |     |    |    |      |
| 18                     |                     | .389* | -.303* |                      |       | .478* | -.119 |                                    |    |    |      |                                     |     |    |    |      |
| 19                     |                     | .682* | -.236  |                      |       | .748* | .037  |                                    |    |    |      |                                     |     |    |    |      |
| 20                     |                     | .085  | .485*  |                      |       | -.107 | .329* |                                    |    |    |      |                                     |     |    |    |      |
| ECV                    | .581                | .113  | .306   | .043                 | .066  | .268  | .769  |                                    |    |    |      |                                     |     |    |    |      |
| $\omega$               | .892                | .522  | .852   | .757                 | .859  | .396  | .859  |                                    |    |    |      |                                     |     |    |    |      |
| $\omega_H/\omega_{HS}$ | .694                | .479  | .226   | .058                 | .064  | .334  | .796  |                                    |    |    |      |                                     |     |    |    |      |

\*  $p < .05$ .

Note: DI/DD = Difficulty Identifying/Difficulty Describing Feelings; DDF = Difficulty Describing Feelings; DIF = Difficulty Identifying Feelings; EOT = Externally-Oriented Thinking; IM = Importance of Emotions; PT = Pragmatic Thinking; BF = Alexithymia General Factor; ECV = Explained Common Variance. <sup>a</sup> = No Convergence, number of iterations exceeded.

**Table S9**  
**Standardized Parameter Estimates for the Common Methods + Bifactor Models – U.S. Sample**

| Item                   | DI/DDF-EOT+CM+BF Model |       |       |       | DIF-DDF-EOT+CM+BF Model |       |       |       |       | DI/DDF-PT-IM+CM+BF Model <sup>a</sup> |       |       |       |       |
|------------------------|------------------------|-------|-------|-------|-------------------------|-------|-------|-------|-------|---------------------------------------|-------|-------|-------|-------|
|                        | DI/DDF                 | EOT   | BF    | CM    | DDF                     | DIF   | EOT   | BF    | CM    | DI/DDF                                | IM    | PT    | BF    | CM    |
| 02                     | .663*                  |       | .567* |       | .372*                   |       |       | .767* |       | .656*                                 |       |       | .576* |       |
| 04                     | .546*                  |       | .355* | .413* | .499*                   |       |       | .497* | .402* | .542*                                 |       |       | .361* | .408* |
| 11                     | .343*                  |       | .559* |       | .102                    |       |       | .661* |       | .334*                                 |       |       | .565* |       |
| 12                     | .342*                  |       | .464* |       | .199*                   |       |       | .551* |       | .334*                                 |       |       | .470* |       |
| 17                     | .299*                  |       | .402* |       | .202*                   |       |       | .475* |       | .290*                                 |       |       | .409* |       |
| 01                     | .436*                  |       | .665* |       |                         | .047  |       | .803* |       | .428*                                 |       |       | .671* |       |
| 03                     | -.124                  |       | .679* |       |                         | .583* |       | .439* |       | -.131                                 |       |       | .676* |       |
| 06                     | .195                   |       | .679* |       |                         | .213* |       | .682* |       | .185                                  |       |       | .682* |       |
| 07                     | -.145                  |       | .799* |       |                         | .681* |       | .533* |       | -.155                                 |       |       | .796* |       |
| 09                     | .289*                  |       | .720* |       |                         | .159* |       | .775* |       | .278*                                 |       |       | .724* |       |
| 13                     | .136                   |       | .792* |       |                         | .313* |       | .732* |       | .126                                  |       |       | .793* |       |
| 14                     | .056                   |       | .700* |       |                         | .293* |       | .621* |       | .046                                  |       |       | .701* |       |
| 05                     |                        | .071  | -.009 | .475* |                         |       | .085* | -.041 | .473* |                                       |       | .135  | -.012 | .472* |
| 08                     |                        | .294* | .212* |       |                         |       | .303* | .196* |       |                                       |       | .789* | .214* |       |
| 10                     |                        | .092* | .107* | .686* |                         |       | .111* | .070* | .689* |                                       | .030  |       | .107* | .690* |
| 15                     |                        | .525* | .122* |       |                         |       | .519* | .151* |       |                                       | 1.80  |       | .130* |       |
| 16                     |                        | .581* | .087* |       |                         |       | .570* | .095* |       |                                       | .181  |       | .095* |       |
| 18                     |                        | .014  | .099* | .573* |                         |       | .044  | .025  | .577* |                                       | -.001 |       | .097* | .572* |
| 19                     |                        | .113* | .094* | .704* |                         |       | .139* | .045  | .706* |                                       | .046  |       | .094* | .706* |
| 20                     |                        | .236* | .244* |       |                         |       | .237* | .238* |       |                                       |       | .181  | .246* |       |
| ECV                    | .190                   | .084  | .571  | .156  | .063                    | .101  | .259  | .602  | .152  | .139                                  | .249  | .055  | .439  | .118  |
| $\omega$               | .917                   | .465  | .894  | .749  | .803                    | .903  | .465  | .894  | .754  | .917                                  | .941  | .425  | .920  | .749  |
| $\omega_H/\omega_{HS}$ | .149                   | .376  | .689  | .707  | .145                    | .166  | .405  | .722  | .714  | .139                                  | .890  | .364  | .705  | .706  |

**Table S9. Continued.**

| Item                   | DIF-DDF-PT-IM+CM+BF Model <sup>b</sup> |       |       |       |       |       |
|------------------------|----------------------------------------|-------|-------|-------|-------|-------|
|                        | DDF                                    | DIF   | IM    | PT    | BF    | CM    |
| 02                     | .369*                                  |       |       |       | .768* |       |
| 04                     | .511*                                  |       |       |       | .496* | .394* |
| 11                     | .095                                   |       |       |       | .663* |       |
| 12                     | .186*                                  |       |       |       | .556* |       |
| 17                     | .187*                                  |       |       |       | .481* |       |
| 01                     |                                        | .054  |       |       | .800* |       |
| 03                     |                                        | .585* |       |       | .437* |       |
| 06                     |                                        | .215* |       |       | .681* |       |
| 07                     |                                        | .680* |       |       | .531* |       |
| 09                     |                                        | .163* |       |       | .773* |       |
| 13                     |                                        | .318* |       |       | .730* |       |
| 14                     |                                        | .297* |       |       | .620* |       |
| 05                     |                                        |       |       | .141* | -.044 | .469* |
| 08                     |                                        |       |       | .766* | .200* |       |
| 10                     |                                        |       | .040  |       | .072* | .695* |
| 15                     |                                        |       | 1.492 |       | .160* |       |
| 16                     |                                        |       | .215  |       | .103* |       |
| 18                     |                                        |       | .006  |       | .026  | .578* |
| 19                     |                                        |       | .060  |       | .046  | .712* |
| 20                     |                                        |       |       | .192* | .241* |       |
| ECV                    | .053                                   | .087  | .190  | .057  | .512  | .125  |
| $\omega$               | .803                                   | .902  | .734  | .410  | .912  | .754  |
| $\omega_H/\omega_{HS}$ | .139                                   | .170  | .700  | .362  | .734  | .714  |

\*  $p < .05$ .

Note: DI/DD = Difficulty Identifying/Difficulty Describing Feelings; DDF = Difficulty Describing Feelings; DIF = Difficulty Identifying Feelings; EOT = Externally-Oriented Thinking; IM = Importance of Emotions; PT = Pragmatic Thinking; BF = Alexithymia General Factor; CM

= Common Method Factor – latent factor for negatively worded items; ECV = Explained Common Variance. <sup>a</sup> = resulted in a negative residual variance for item 15 (-2.184). <sup>b</sup> = resulted in a negative residual variance for item 15 (-1.211).

**Table S10**

*Standardized Parameter Estimates for the Common Methods + Bifactor Models – Philippines Sample*

| Item                            | DI/DDF-EOT+CM+BF Model |       |       |      | DIF-DDF-EOT+CM+BF Model |       |       |        |       | DI/DDF-IM-PT+CM+BF Model <sup>a</sup> |    |    |    |    |
|---------------------------------|------------------------|-------|-------|------|-------------------------|-------|-------|--------|-------|---------------------------------------|----|----|----|----|
|                                 | DI/DDF                 | EOT   | BF    | CM   | DDF                     | DIF   | EOT   | BF     | CM    | DI/DDF                                | IM | PT | BF | CM |
| 02                              | .697*                  |       | .311* |      | -.030                   |       |       | .772*  |       |                                       |    |    |    |    |
| 04                              | .630*                  |       | .030  | .699 | -.011                   |       |       | .538*  | .394* |                                       |    |    |    |    |
| 11                              | .560*                  |       | .393* |      | .126                    |       |       | .681*  |       |                                       |    |    |    |    |
| 12                              | .365*                  |       | .424* |      | .770                    |       |       | .518*  |       |                                       |    |    |    |    |
| 17                              | .358*                  |       | .330* |      | .072                    |       |       | .479*  |       |                                       |    |    |    |    |
| 01                              | .704*                  |       | .351* |      |                         | .088  |       | .778*  |       |                                       |    |    |    |    |
| 03                              | .306*                  |       | .395* |      |                         | .463* |       | .412*  |       |                                       |    |    |    |    |
| 06                              | .450*                  |       | .415* |      |                         | .020  |       | .609*  |       |                                       |    |    |    |    |
| 07                              | .374*                  |       | .433* |      |                         | .470* |       | .490*  |       |                                       |    |    |    |    |
| 09                              | .649*                  |       | .375* |      |                         | .078  |       | .750*  |       |                                       |    |    |    |    |
| 13                              | .615*                  |       | .471* |      |                         | .292* |       | .740*  |       |                                       |    |    |    |    |
| 14                              | .443*                  |       | .455* |      |                         | .167  |       | .600*  |       |                                       |    |    |    |    |
| 05                              |                        | .317* | -.038 | .379 |                         |       | .039  | .024   | .526* |                                       |    |    |    |    |
| 08                              |                        | .172  | .484* |      |                         |       | .458* | .290*  |       |                                       |    |    |    |    |
| 10                              |                        | .323* | -.001 | .311 |                         |       | .108  | -.107  | .468* |                                       |    |    |    |    |
| 15                              |                        | -.006 | .294* |      |                         |       | .436* | .061   |       |                                       |    |    |    |    |
| 16                              |                        | .024  | .325* |      |                         |       | .395* | .144*  |       |                                       |    |    |    |    |
| 18                              |                        | .484* | -.167 | .103 |                         |       | .043  | -.134* | .462* |                                       |    |    |    |    |
| 19                              |                        | .695* | .017  | .274 |                         |       | .159  | .019   | .634* |                                       |    |    |    |    |
| 20                              |                        | -.119 | .525* |      |                         |       | .309* | .308*  |       |                                       |    |    |    |    |
| ECV                             | .474                   | .094  | .348  | .084 | .076                    | .069  | .262  | .660   | .114  |                                       |    |    |    |    |
| ω                               | .897                   | .478  | .871  | .537 | .793                    | .858  | .430  | .873   | .649  |                                       |    |    |    |    |
| ω <sub>H</sub> /ω <sub>HS</sub> | .591                   | .264  | .387  | .532 | .068                    | .094  | .385  | .748   | .634  |                                       |    |    |    |    |

**Table S10, Continued**

| Item                   | DIF-DDF-PT-IM+CM+BF Model |       |       |      |        |       |
|------------------------|---------------------------|-------|-------|------|--------|-------|
|                        | DDF                       | DIF   | IM    | PT   | BF     | CM    |
| 02                     | .190                      |       |       |      | .745*  |       |
| 04                     | .567                      |       |       |      | .500*  | .452* |
| 11                     | .021                      |       |       |      | .689*  |       |
| 12                     | .003                      |       |       |      | .540*  |       |
| 17                     | .065                      |       |       |      | .484*  |       |
| 01                     |                           | .063  |       |      | .773*  |       |
| 03                     |                           | .471* |       |      | .427*  |       |
| 06                     |                           | -.024 |       |      | .617*  |       |
| 07                     |                           | .432* |       |      | .513*  |       |
| 09                     |                           | .041  |       |      | .750*  |       |
| 13                     |                           | .253* |       |      | .756*  |       |
| 14                     |                           | .120  |       |      | .616*  |       |
| 05                     |                           |       |       | .187 | .005   | .653* |
| 08                     |                           |       |       | .406 | .307*  |       |
| 10                     |                           |       | .254* |      | -.098  | .374* |
| 15                     |                           |       | .091  |      | .084   |       |
| 16                     |                           |       | .060  |      | .159*  |       |
| 18                     |                           |       | .358* |      | -.125* | .317* |
| 19                     |                           |       | .588* |      | .026   | .459* |
| 20                     |                           |       |       | .256 | .324*  |       |
| ECV                    | .043                      | .064  | .054  | .034 | .720   | .102  |
| $\omega$               | .770                      | .859  | .296  | .353 | .867   | .654  |
| $\omega_H/\omega_{HS}$ | .052                      | .068  | .295  | .218 | .776   | .639  |

\*  $p < .05$ .

Note: DI/DD = Difficulty Identifying/Difficulty Describing Feelings; DDF = Difficulty Describing Feelings; DIF = Difficulty Identifying Feelings; EOT = Externally-Oriented Thinking; IM = Importance of Emotions; PT = Pragmatic Thinking; BF = Alexithymia General Factor; CM = Common Method Factor – latent factor for negatively worded items; ECV = Explained Common Variance. <sup>a</sup> = No Convergence, number of iterations exceeded for DI/DDF-PT-IM+CM+BF Model.



### **MG-CFA of the DI/DDF-EOT+CM+BF Model**

In the main article, multiple group confirmatory factor analysis (MG-CFA) was performed on a DI/DDF-EOT bifactor model with all the negatively worded items dropped. Across the 18 CFA models examined in the main article, the DI/DDF-EOT+CM+BF was the better fitting model between the U.S. and Philippines sample. The goal for this section is to present the results of the MG-CFA on the DI/DDF-EOT+CM+BF model. MG-CFA procedures were identical to those reported in the main article.

A configural model was estimated, with the U.S. sample as the reference group. Metric invariance model was subsequently estimated by constraining unstandardized item factor loadings as equal across samples. The metric invariance model resulted in a significantly worse model fit relative to the configural model ( $-2\Delta LL_{\text{corrected}} = 62.389$ ,  $\Delta df = 41$ ,  $p = .02$ ), and the source of model misfit stemmed from the factor loading from the alexithymia general factor to item 18 (unstandardized factor loading U.S. = 0.077,  $p = .02$ ; PH = -0.109,  $p = .07$ ). Allowing item 18 – general alexithymia factor loading to vary across samples did not result in a significantly worse model fit compared to the configural model ( $-2\Delta LL_{\text{corrected}} = 53.572$ ,  $\Delta df = 40$ ,  $p = .07$ ).

The scalar invariance model was estimated by constraining item intercepts to be equal across samples. Model comparisons indicated significant decrease in model fit relative to the partial metric invariance model ( $-2\Delta LL_{\text{corrected}} = 132.950$ ,  $\Delta df = 16$ ,  $p < .01$ ). Sources of model misfit stemmed from items 1 (US = 2.347; PH = 2.519), 6 (US = 2.356; PH = 2.628), 7 (US = 1.931; PH = 2.099), 13 (US = 2.053; PH = 1.943), and 18 (US = 2.170; PH = 2.721). Allowing these items intercepts to vary across samples did not result in a worse model fit compared to the partial metric invariance model ( $-2\Delta LL_{\text{corrected}} = 19.370$ ,  $\Delta df = 11$ ,  $p = .05$ ).

Due to the non-invariance in the metric and scalar invariance models, residual variances for items 1, 6, 7, 13, and 18 were allowed to vary across samples. Residual variance invariance model was subsequently estimated, and model comparisons indicated a significantly worse fit compared to the partial scalar invariance model ( $-2\Delta LL_{\text{corrected}} = 53.713$ ,  $\Delta df = 15$ ,  $p < .01$ ). After unconstraining residual variances for items 3, 5, and 14, the partial residual variance invariance model did not result in a worse model compared to the partial scalar invariance model ( $-2\Delta LL_{\text{corrected}} = 13.594$ ,  $\Delta df = 12$ ,  $p = .33$ ).

For the latent factor variance invariance model, latent factor variances were constrained to 1 for both samples, which resulted in a significantly worse model fit compared to the partial residual variance invariance model ( $-2\Delta LL_{\text{corrected}} = 38.291$ ,  $\Delta df = 4$ ,  $p < .01$ ). Sources of model misfit stemmed from the DI/DDDF, EOT, and the CM. With the U.S. sample set as the reference group (i.e., latent factor variance set at 1), the Philippines sample had less variability in the DI/DDDF (0.479), EOT (0.697), and CM (0.588) latent factors. Allowing these latent factors to vary across samples did not result in a worse fit compared to the partial residual variance invariance model ( $-2\Delta LL_{\text{corrected}} = 2.687$ ,  $\Delta df = 1$ ,  $p = .10$ ).

For the latent factor mean invariance model, latent factor means were constrained to 0 for both samples, which resulted in a significantly worse model fit compared to the partial latent factor variance invariance model ( $-2\Delta LL_{\text{corrected}} = 236.938$ ,  $\Delta df = 4$ ,  $p < .01$ ). Sources of model misfit stemmed from the general alexithymia factor and the common methods factor. With the U.S. sample as the reference group (i.e., latent factor mean = 0), results indicates that the Philippines sample had higher alexithymia general latent factor mean (1.011,  $p < .01$ ) but lower common method latent factor mean ( $-0.284$ ,  $p < .01$ ).
